# Supplementary material for: Asymptomatic Patients With Brugada ECG Pattern: Long-Term Prognosis From a Large Prospective Study
Source: PubMed Central journal article supplement — Circulation. 2023 Oct 13;148(20):1543–55. doi: 10.1161/CIRCULATIONAHA.123.064689 (PMC10637308; doi:10.1161/circulationaha.123.064689), 2023-10-13
Supplement: cir-148-1543-s001.pdf [file cir-148-1543-s001.pdf]

## SUPPLEMENTAL MATERIAL

**Table S1.** Characteristics of the 539 asymptomatic patients with spontaneous type 1 Brugada ECG pattern.

|                                    | Value    | Events  | No events | UNIVARIATE (p-value) | Multivariable logistic regression | Cox Regression         |
|------------------------------------|----------|---------|-----------|----------------------|-----------------------------------|------------------------|
| Total number of patients           | 539      | 16(3%)  | 523       |                      |                                   |                        |
| Age at diagnosis (mean±SD)         | 45±14    | 49±12   | 46±13     | 0.31                 | p=0.39                            | p=0.33                 |
| Males                              | 433(80%) | 13(3%)  | 420       | 0.99                 | p=0.60                            | p=0.59                 |
| EPS performed                      | 339(63%) |         |           |                      | p=0.02                            | p=0.037                |
| Positive EPS                       | 103(30%) | 7(6.8%) | 96        | 0.025                | <b>OR=4.8(1.3-18)</b>             | <b>RR= 4.1(1.1-15)</b> |
| Genetic test performed             | 195      |         |           |                      |                                   |                        |
| SCN5A mutation                     | 45(23%)  | 1(2.2%) | 44        | 0.43                 |                                   |                        |
| Atrial fibrillation (<40 years)    | 8(1.5%)  | 1(12%)  | 7         | 0.24                 |                                   |                        |
| Family History                     |          |         |           |                      |                                   |                        |
| Brugada syndrome                   | 100(19%) | 5(5%)   | 95        | 0.23                 |                                   |                        |
| Sudden Death <40years              | 74(14%)  | 1(1.3%) | 73        | 0.37                 |                                   |                        |
| Type 1 pattern in peripheral leads | 14(2.6%) | 1(7%)   | 13        | 0.41                 |                                   |                        |
| Early repolarization               | 16(3%)   | 0       | 16        | 0.61                 |                                   |                        |

EPS= electrophysiological study; SD=standard deviation

Figure S1.

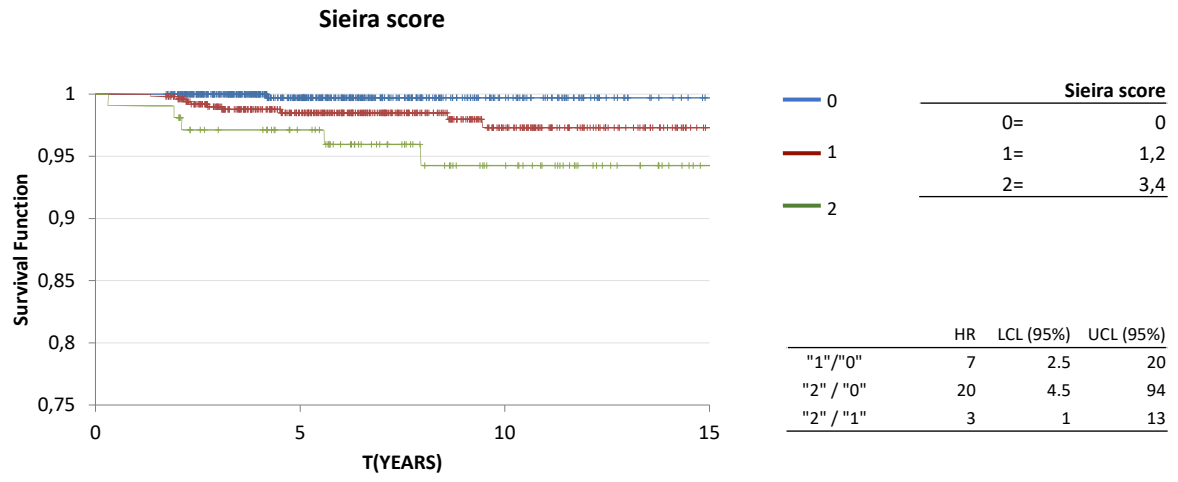

| Score | Number at risk |     |     |    |
|-------|----------------|-----|-----|----|
| 0     | 531            | 289 | 69  | 13 |
| 1,2   | 512            | 356 | 133 | 35 |
| 3,4   | 106            | 86  | 46  | 15 |

Figure S2.

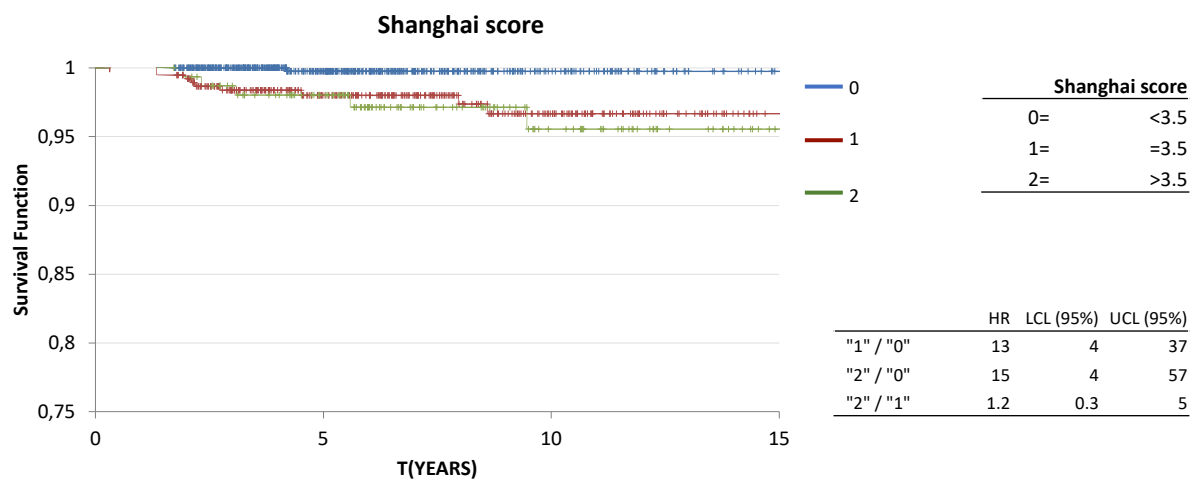

| Score | Number at risk |     |     |    |
|-------|----------------|-----|-----|----|
| <3.5  | 610            | 350 | 86  | 17 |
| 3.5   | 383            | 256 | 105 | 24 |
| >3.5  | 156            | 122 | 54  | 13 |

Figure S3.

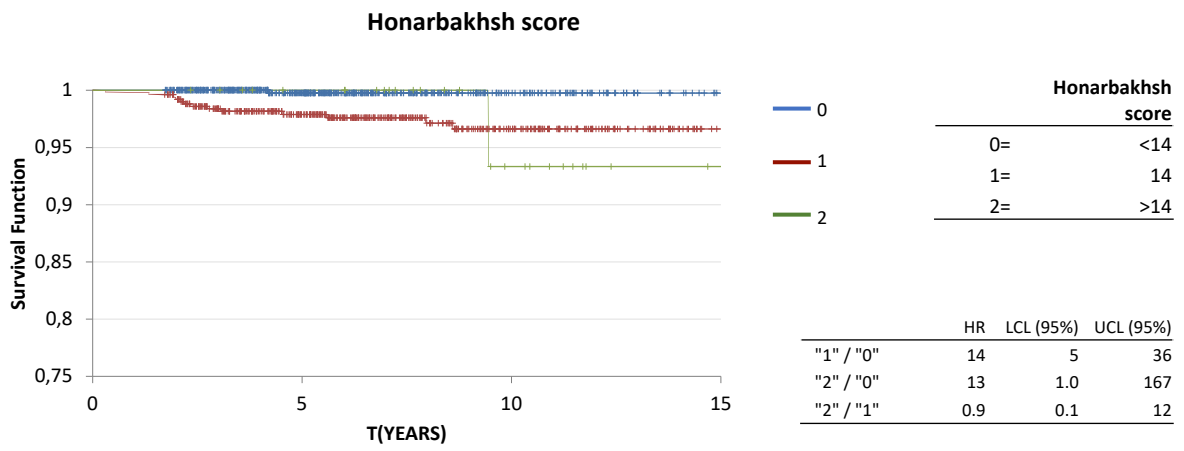

| Score | Number at risk |     |     |    |
|-------|----------------|-----|-----|----|
| <14   | 610            | 349 | 88  | 18 |
| 14    | 509            | 353 | 146 | 40 |
| >14   | 30             | 25  | 12  | 4  |

## **Supplemental Figure Legends.**

### **Figure S1.**

Event-free survival according to the Sieira score<sup>12</sup> applied to the study population. The comparison between the different risk levels has been reported as hazard ratio (HR) with relative upper and lower confidence limit (ULC/LCL).

### **Figure S2.**

Event-free survival according to the Shanghai score<sup>13</sup> applied to the study population. The comparison between the different risk levels has been reported as hazard ratio (HR) with relative upper and lower confidence limit (ULC/LCL).

### **Figure S3.**

Event-free survival according to the Honarbakhsh score<sup>14</sup> applied to the study population. The comparison between the different risk levels has been reported as hazard ratio (HR) with relative upper and lower confidence limit (ULC/LCL).
